# Supplementary material for: Highly transparent poly(2-ethyl-2-oxazoline)-TiO2nanocomposite coatings for the conservation of matte painted artworks
Source: Royal Society of Chemistry journal article supplement (doi:10.1039/c5ra10895k), 2015-01-01
Supplement: c5ra10895k1.pdf [file c5ra10895k1.pdf]

## Supporting Information

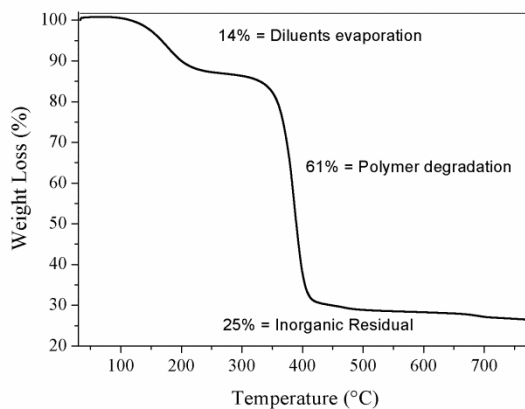

Fig. S1: TGA of the commercial tube colour used for the preparation of the black painting model.

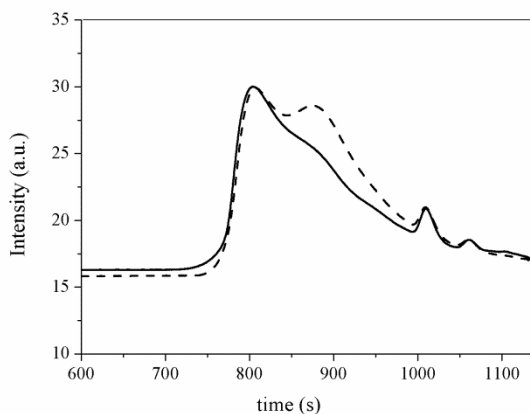

Fig. S2: GPC analysis of the sample C0 before (dash line) and after (solid line) 44 hours of artificial aging

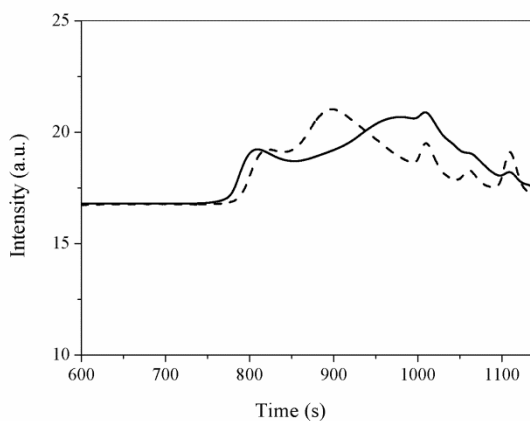

Fig. S3: GPC analysis of the sample C44 before (dash line) and after (solid line) 44 hours of artificial aging.
